# Supplementary material for: A Family Case of Congenital Myasthenic Syndrome-22 Induced by Different Combinations of Molecular Causes in Siblings
Source: PubMed Central journal article supplement (PMC7397044; doi:10.3390/genes11070821), 2020-07-19
Supplement: genes-11-00821-s001.pdf [file genes-11-00821-s001.pdf]

Supplementary Materials:

Figure S1:

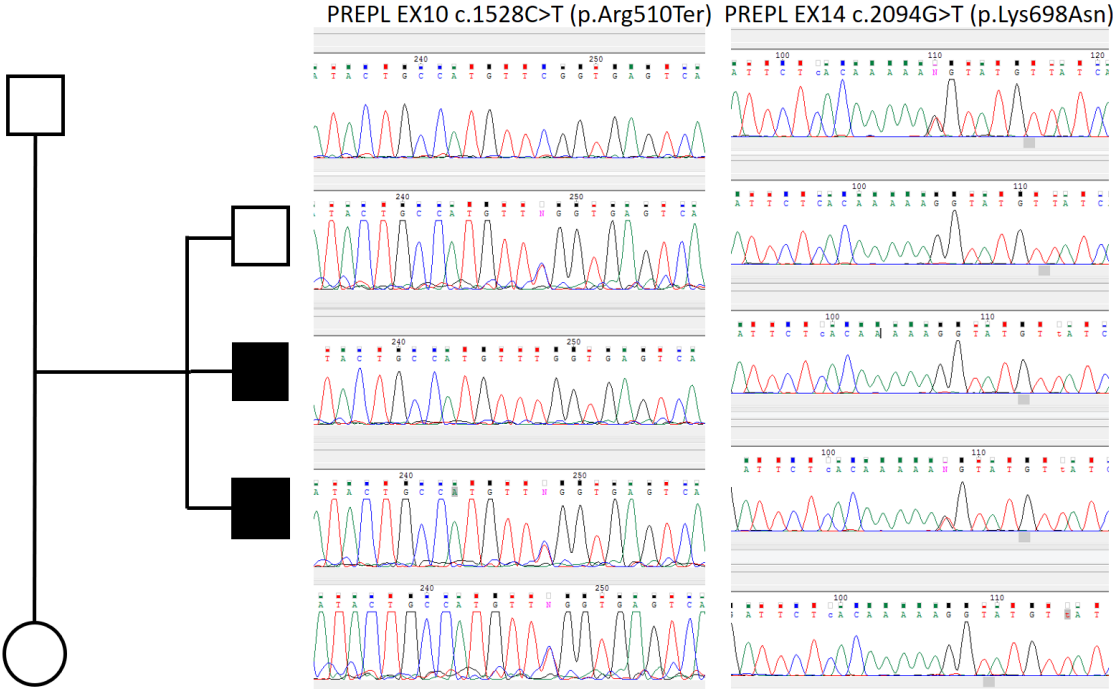

Sanger sequencing of *PREPL* exons 10 and 14.

Figure S2

|            |                   | Probe target info | AllSamples    |         |         |         |         |         |         |         |      |
|------------|-------------------|-------------------|---------------|---------|---------|---------|---------|---------|---------|---------|------|
|            |                   |                   | CYS 1.1       | CYS 2.1 | CYS 3.1 | CYS 4.1 | CYS 5.1 | CYS 953 | CYS 954 | CYS 956 |      |
| FRSS (n=7) | n/a               |                   | 90%           | 100%    | 100%    | 100%    | 90%     | 90%     | 90%     | 90%     |      |
| CAS (n=5)  | FMRS              | n/a               | 100%          | 100%    | 100%    | 100%    | 100%    | 100%    | 100%    | 100%    |      |
|            | PSLP - Relati...  | n/a               | OK            | OK      | OK      | OK      | OK      | OK      | OK      | OK      |      |
|            | FSLP - Relati...  | n/a               | OK            | OK      | OK      | OK      | OK      | OK      | OK      | OK      |      |
|            | RSQ - Referenc... | n/a               | Warning       | Warning | Warning | Warning | Warning | Warning | Warning | Warning |      |
|            | RPQ - Referenc... | n/a               | OK            | OK      | Warning | Warning | OK      | OK      | OK      | OK      |      |
| 02p (n=24) | PPM1B-6           | 02-044.313084     | 1.02          | 1.1     | 1.06    | 1.24    | 0.98    | 0.95    | 0.97    | 0.93    |      |
|            | SLC3A1-1          | 02-044.356105     | 0.96          | 0.96    | 0.95    | 0.75    | 1.04    | 1.19    | 1.15    | 1.15    |      |
|            | SLC3A1-2          | 02-044.361489     | 0.92          | 1.15    | 0.78    | 0.96    | 1.17    | 1.05    | 1.11    | 0.93    |      |
|            | SLC3A1-3          | 02-044.362145     | 1.06          | 1.01    | 0.95    | 1       | 1.1     | 1       | 1       | 0.95    |      |
|            | SLC3A1-4          | 02-044.366525     | 0.92          | 0.73    | 1.02    | 1.03    | 0.86    | 1.05    | 1       | 1       |      |
|            | SLC3A1-5          | 02-044.380661     | 0.97          | 0.82    | 0.93    | 1       | 1.05    | 1.01    | 1       | 1.04    |      |
|            | SLC3A1-6          | 02-044.381780     | 0.97          | 1       | 0.9     | 0.93    | 1.06    | 1.06    | 1.01    | 1       |      |
|            | SLC3A1-7          | 02-044.384776     | 1             | 1.01    | 1.05    | 0.92    | 0.94    | 0.99    | 0.94    | 1.01    |      |
|            | SLC3A1-8          | 02-044.393290     | 0.93          | 0.97    | 1.08    | 0.91    | 0.93    | 0.96    | 0.93    | 1       |      |
|            | SLC3A1-9          | 02-044.394440     | 0.97          | 1.06    | 0.9     | 1.01    | 1.1     | 1.01    | 0.99    | 0.99    |      |
|            | SLC3A1-10         | 02-044.400839     | 1.05          | 1.02    | 1.09    | 1.04    | 0.96    | 0.88    | 0.95    | 0.91    |      |
|            | PREPL-15          | 02-044.401981     | 1.03          | 1.01    | 1.06    | 1.12    | 0.97    | 0.95    | 0.96    | 0.96    |      |
|            | PREPL-13          | 02-044.403245     | 0.95          | 0.96    | 0.98    | 0.9     | 1.03    | 1.02    | 1.05    | 1.06    |      |
|            | PREPL-12          | 02-044.403850     | 1             | 0.96    | 0.98    | 1.11    | 1.03    | 1       | 1       | 0.97    |      |
|            | PREPL-11          | 02-044.407402     | 1             | 0.92    | 0.97    | 0.97    | 1.01    | 1       | 1       | 1.04    |      |
|            | PREPL-10          | 02-044.409594     | 1.06          | 0.93    | 1.06    | 1.24    | 0.95    | 0.95    | 0.92    | 0.92    |      |
|            | PREPL-9           | 02-044.413101     | 1.02          | 1.01    | 0.98    | 1.08    | 1.07    | 0.87    | 0.88    | 0.81    |      |
|            | PREPL-7           | 02-044.419726     | 0.93          | 1.09    | 1.05    | 0.77    | 0.96    | 1.18    | 1.13    | 1.18    |      |
|            | PREPL-6           | 02-044.423103     | 1.01          | 1.06    | 1.03    | 0.99    | 0.97    | 0.99    | 1.01    | 0.98    |      |
|            | PREPL-5           | 02-044.424426     | 1.02          | 1.01    | 1.06    | 1.13    | 0.98    | 0.94    | 0.92    | 0.94    |      |
|            | PREPL-4           | 02-044.428188     | 0.88          | 0.91    | 0.97    | 1.01    | 1.03    | 1.1     | 1.15    | 1.06    |      |
|            | PREPL-2           | 02-044.440319     | 1.04          | 1.05    | 0.96    | 1.22    | 1.05    | 0.91    | 0.96    | 0.91    |      |
|            | PREPL-1           | 02-044.442205     | 1.01          | 1.11    | 0.98    | 0.88    | 1.11    | 0.99    | 1.04    | 1.03    |      |
|            | CAMKMT-2          | 02-044.453469     | 1             | 1.23    | 1.02    | 1.1     | 1       | 0.91    | 0.93    | 0.9     |      |
| 19q (n=15) | TDRD12-13         | 19-037.973452     | 1.04          | 1.04    | 0.96    | 1.12    | 1.04    | 0.93    | 0.93    | 0.93    |      |
|            | SLC7A9-13         | 19-038.013357     | 1.07          | 1.06    | 1.07    | 1.17    | 0.94    | 0.95    | 0.93    | 0.95    |      |
|            | SLC7A9-12         | 19-038.015951     | 0.99          | 0.9     | 1.02    | 1.02    | 0.94    | 0.99    | 1.02    | 1.02    |      |
|            | SLC7A9-11         | 19-038.024875     | 1.02          | 0.71    | 1.02    | 0.99    | 0.95    | 1       | 1       | 1.05    |      |
|            | SLC7A9-10         | 19-038.026617     | 1.02          | 1.1     | 1.01    | 1.09    | 0.98    | 0.98    | 0.95    | 0.98    |      |
|            | SLC7A9-9          | 19-038.041216     | 1.04          | 1.11    | 1.09    | 1.24    | 0.93    | 0.94    | 0.96    | 0.91    |      |
|            | SLC7A9-8          | 19-038.042576     | 1.01          | 0.93    | 1.05    | 1.07    | 0.95    | 1.02    | 0.96    | 0.99    |      |
|            | SLC7A9-7          | 19-038.043255     | 0.96          | 0.77    | 0.84    | 0.86    | 1.04    | 1.06    | 1.08    | 1.06    |      |
|            | SLC7A9-6          | 19-038.044903     | 0.96          | 1.04    | 0.91    | 0.77    | 1.05    | 1.24    | 1.16    | 1.24    |      |
|            | SLC7A9-5          | 19-038.045101     | 0.99          | 1.05    | 0.96    | 0.78    | 1.08    | 1.04    | 1.01    | 1.04    |      |
|            | SLC7A9-4          | 19-038.047010     | 0.98          | 1.08    | 1.02    | 0.82    | 0.95    | 1.15    | 1.12    | 1.19    |      |
|            | SLC7A9-3          | 19-038.047524     | 1.07          | 1.22    | 1.04    | 1.21    | 0.96    | 0.9     | 0.87    | 0.91    |      |
|            | SLC7A9-2          | 19-038.051169     | 1             | 1.04    | 1       | 0.99    | 1.01    | 0.98    | 0.98    | 1.01    |      |
|            | SLC7A9-1          | 19-038.052498     | 0.99          | 0.71    | 0.89    | 0.89    | 1.01    | 1.12    | 1.11    | 1.08    |      |
|            | CEP89-19          | 19-038.061925     | 1.05          | 1.29    | 1.07    | 1.05    | 0.95    | 0.87    | 0.91    | 0.92    |      |
|            | References...     | Reference*        | 01-214.565404 | 0.96    | 0.88    | 1.05    | 0.95    | 1       | 1.01    | 1       | 1.01 |
|            |                   | Reference*        | 04-053.940141 | 0.97    | 1.04    | 0.89    | 0.9     | 1.04    | 1       | 1.02    | 1    |
|            |                   | Reference*        | 07-075.448405 | 1.04    | 0.95    | 1.07    | 1.21    | 0.91    | 0.99    | 0.96    | 1.01 |
|            |                   | Reference*        | 11-006.369211 | 1       | 1.17    | 0.88    | 0.97    | 1.05    | 1.02    | 1       | 0.95 |
| Reference* |                   | 12-013.797533     | 1.04          | 1.25    | 0.99    | 1.07    | 1.01    | 0.96    | 0.95    | 0.96    |      |
| Reference* |                   | 13-024.357452     | 0.95          | 0.91    | 0.9     | 0.94    | 1.06    | 1.23    | 1.21    | 1.16    |      |
| Reference* |                   | 16-055.463765     | 1             | 1.05    | 0.93    | 0.91    | 1       | 1.11    | 1.09    | 1.1     |      |
| Reference* |                   | 17-041.405030     | 1.04          | 0.92    | 1.11    | 1.1     | 0.97    | 1       | 1       | 1       |      |
| Reference* |                   | 18-045.817181     | 1.02          | 0.81    | 1.02    | 0.95    | 0.9     | 1.03    | 1.05    | 0.99    |      |

Results of quantitative analysis using SALSA MLPA Probemix P426 Cystinuria (MRC-Holland). 1.1 – Patient 1; 5.1 – Patient 2; 4.1 – healthy sibling; 3.1 – mother; 2.1 – father; CYS 953, CYS 954, CYS 956 - control samples of healthy adults

Figure S3

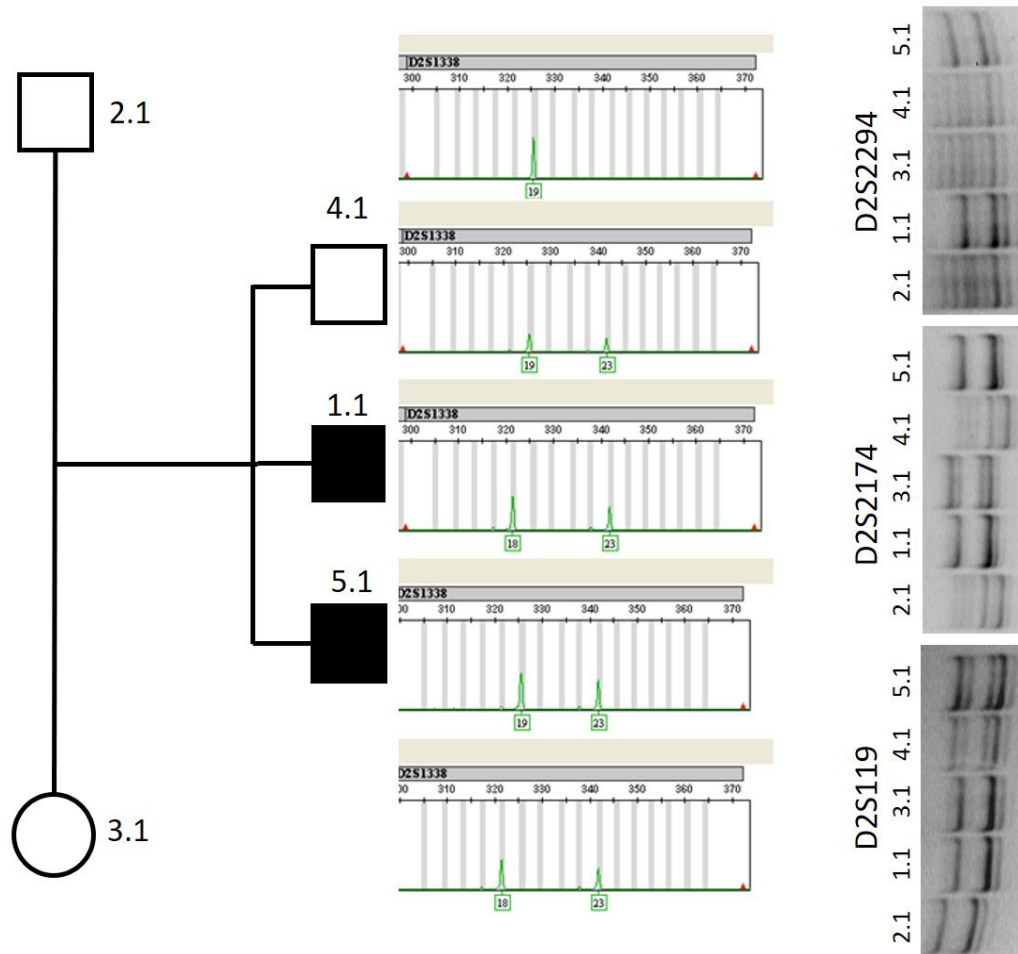

Genotyping results of chromosome 2 markers. 1.1 – Patient 1; 5.1 – Patient 2; 4.1 – healthy sibling; 3.1 – mother; 2.1 – father.
